# Supplementary material for: Core Genome Multilocus Sequence Typing for Food Animal Source Attribution of Human Campylobacter jejuni Infections
Source: MDPI journal article supplement (doi:10.3390/pathogens9070532), 2020-07-02
Supplement: s1 [file s1]

## Cluster Distribution by Population

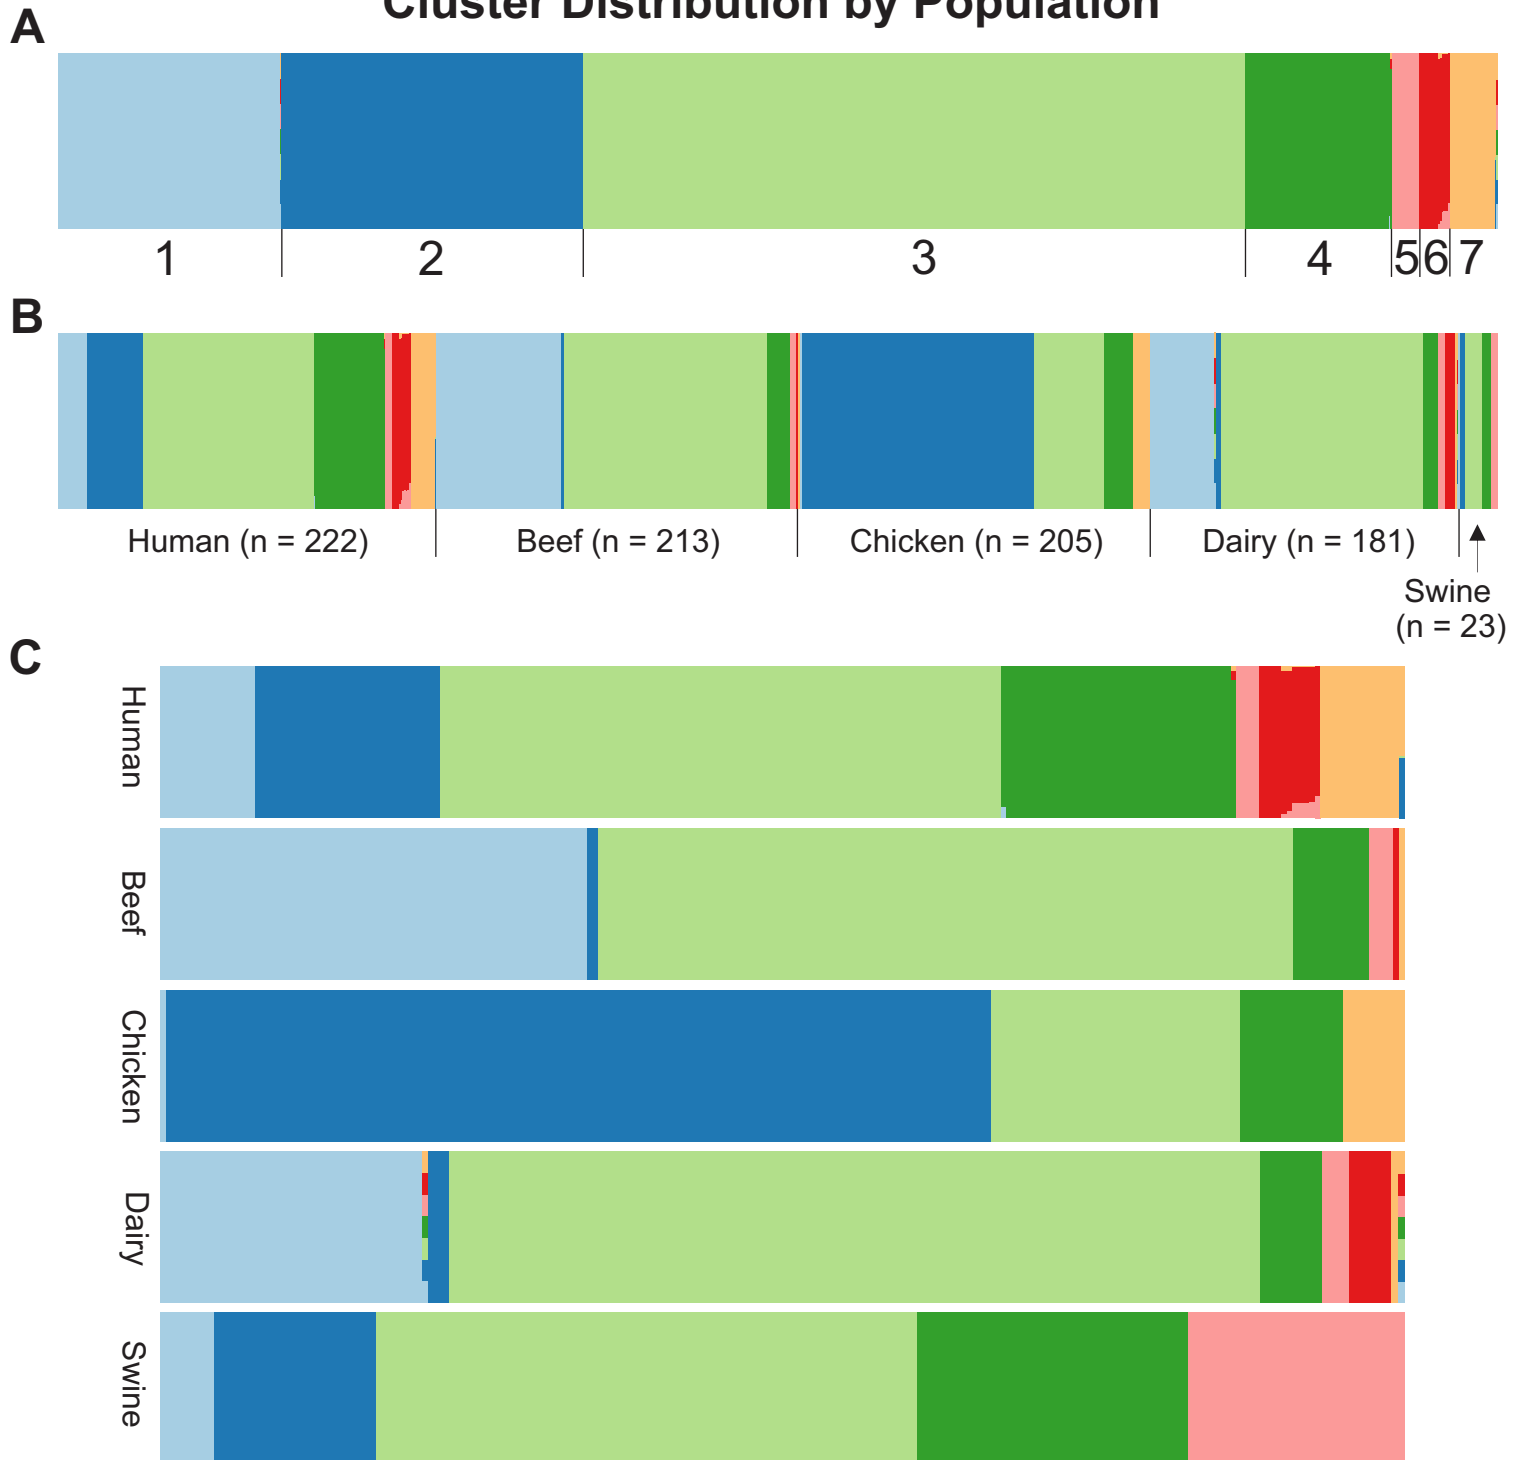

Figure S1: Distribution of conserved population clusters as determined by STRUCTURE analysis of cgMLST allele profiles for 844 *C. jejuni* isolates. Cluster frequencies are shown both by A) aggregate population and B) source animal contribution. C) Proportional contribution of clusters illustrates differences in population composition between animal sources.
