# Supplementary material for: Core Genome Multilocus Sequence Typing for Food Animal Source Attribution of Human Campylobacter jejuni Infections
Source: MDPI journal article supplement (doi:10.3390/pathogens9070532), 2020-07-02
Supplement: s1 [file s1]

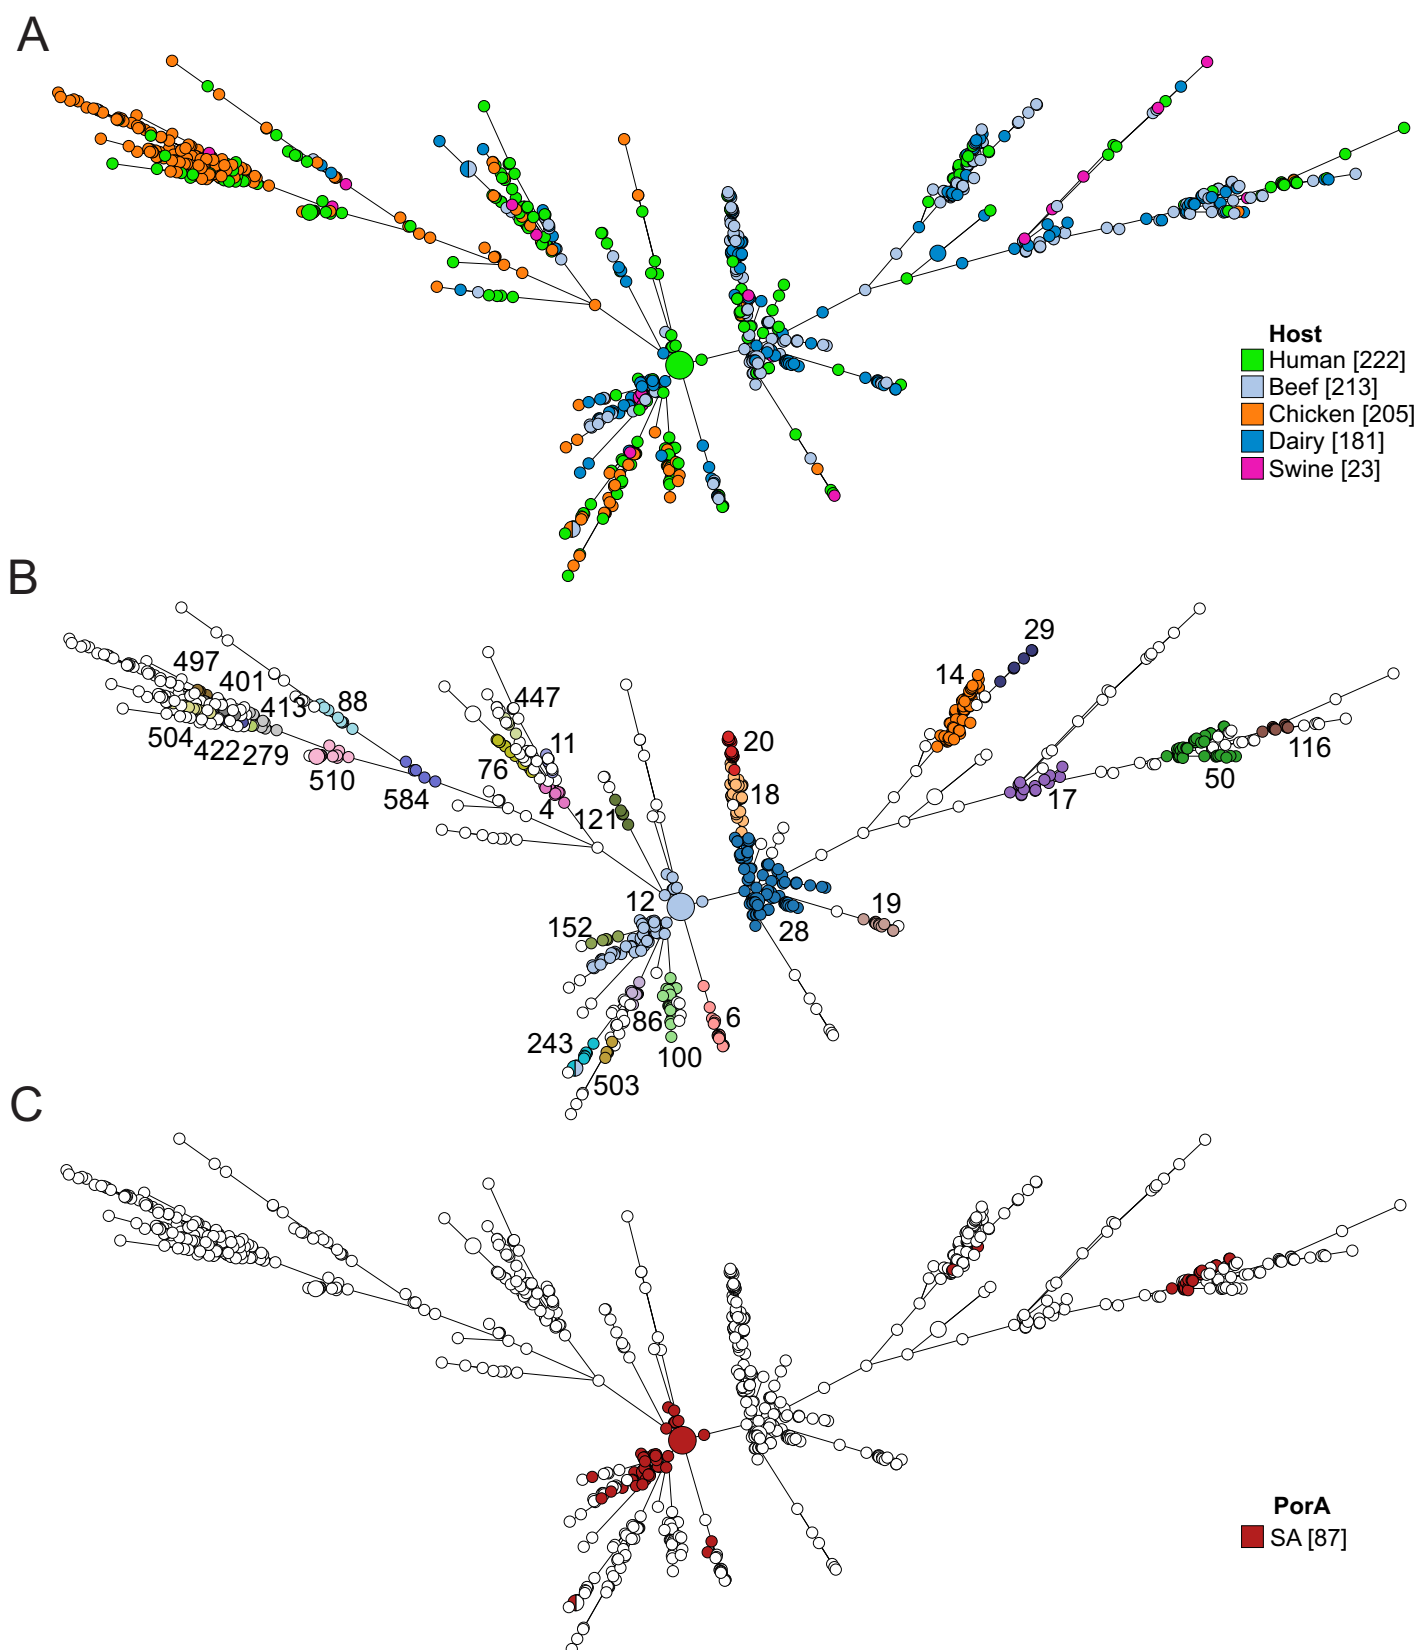

Figure S2: Minimum spanning trees of *C. jejuni* isolates as constructed from cgMLST profiles represented by A) isolation source, B) most populous cgMLST-200 group and C) presence of SA-associated PorA sequence.
